# Supplementary material for: ET Cool Home: Innovative Educational Activities on Evapotranspiration and Urban Heat
Source: Copernicus journal article supplement (doi:10.5194/hess-2023-296), 2023-12-18
Supplement: Supplementary file 1 [file c_calculation-spreadsheet.xlsx]

## Sheet: Inputs
DATA	TYPE	Time Recorded	Initial Mass (g)	Initial Surface Temperature (C)	Time Recorded	Final Mass (g)	Final Surface Temperature (C)		CONSTANTS
Asphalt	Dry	08:28:00	198	21.9	10:13:00	198	66.3		Description	Symbol	Value	Units
	Wet	08:28:00	255	19.9	10:14:00	254	34.8		Surface area of tubes	A	18.0956	cm2
Gravel	Dry	08:25:00	218	22	10:12:00	218	40		Density of Water at 20℃ and 1 atm	ρH20	0.99823	g/cm3
	Wet	08:20:00	276	20	10:12:00	258	31		Density of Air at 20℃ and 1 atm	ρair	1204.7	g/m3
Mulch	Dry	08:21:00	48	22.5	10:12:00	48	65.5		Specific heat capacity of air at 20℃ and 1 atm	Cpair	1006.1	J/(kg·K)
	Wet	08:21:00	149	20.1	10:12:00	147	35		Air Temperature	Ta	293.15	K
Soil	Dry	08:25:00	154	21	10:14:00	152	35		Aerodynamic resistence	ra	208	m/s
	Wet	08:19:00	228	20	10:14:00	225	35		Incoming shortwave radiation	SWin	348.1	W/m2
Grass	Dry	08:24:00	164	18.1	10:14:00	162	25.3		Latent heat of vaporization for water	lv	2.26 x 106	J/kg
	Wet	08:24:00	204	18	10:13:00	202	23.2		Albedo of asphalt	αasphalt	0.05	-
									Albedo of wet gravel	αgravel,wet	0.3	-
Diameter of Land Surface Core			4.8	cm					Albedo of dry gravel	αgravel,dry	0.45	-
									Albedo of wet mulch	αmulch,wet	0.2	-
									Albedo of dry mulch	αmulch,dry	0.25	-
									Albedo of wet soil	αsoil,wet	0.15	-
									Albedo of dry soil	αsoil,dry	0.2	-
									Albedo of grass	αgrass	0.26	-
									CONVERSION FACTORS
									1 J = 1 W·s
									K = ℃ + 273.15
									1 day = 24 h = 86400 s
									1 m = 100 cm = 1000 mm

## Sheet: Results
CALCULATIONS - ENERGY BALANCE
		Ts,final - Ta (K)	α [-]	Hs (W/m2)	LE (W/m2)	ET (mm/day)
Asphalt	Dry	44.4	0.05	258.726	71.9692	2.75638
	Wet	14.9	0.05	86.8246	243.87	9.34009
Gravel	Dry	18	0.45	104.889	86.5662	3.31543
	Wet	11	0.3	64.0987	179.571	6.87747
Mulch	Dry	43	0.25	250.568	10.5072	0.402421
	Wet	14.9	0.2	86.8246	191.655	7.34029
Soil	Dry	14	0.2	81.5802	196.9	7.54115
	Wet	15	0.15	87.4074	208.478	7.98457
Grass	Dry	7.2	0.26	41.9555	215.638	8.25883
	Wet	5.2	0.26	30.3012	227.293	8.70518
CALCULATIONS - MASS BALANCE
		Minit - Mfinal (g)	Time (min)	ET (mm/d)
Asphalt	Dry	0	105	0
	Wet	1	106	7.50731
Gravel	Dry	0	107	0
	Wet	18	112	127.892
Mulch	Dry	0	111	0
	Wet	2	111	14.3383
Soil	Dry	2	109	14.6014
	Wet	3	115	20.7593
Grass	Dry	2	110	14.4686
	Wet	2	109	14.6014
