# Supplementary material for: ET Cool Home: Innovative Educational Activities on Evapotranspiration and Urban Heat
Source: Copernicus journal article supplement (doi:10.5194/hess-2023-296), 2023-12-18
Supplement: Supplementary file 1 [file hess-2023-296-supplement.zip]

Archive with 3 entries (3 files):
- a_instructor-notes.pdf
- b_unit-conversions_dimensional-analysis.pdf
- c_calculation-spreadsheet.xlsx
